Development 139, 1885 (2012) doi:10.1242/dev.082818  
© 2012. Published by The Company of Biologists Ltd

## Integration of Hedgehog and BMP signalling by the *engrailed2a* gene in the zebrafish myotome

Ashish K. Maurya, Haihan Tan, Marcel Souren, Xingang Wang, Joachim Wittbrodt and Philip W. Ingham

There was an error published in *Development* **138**, 755-765.

On p. 756, the *actin:GAL4* transgenic strain was erroneously attributed to Scheer and Campos-Ortega (1999). This line [which now appears on ZFIN with designation *Tg(actc1b:GAL4)<sup>i269</sup>*] should have been attributed to Sudipto Roy and Franco di Giovine who generated it in the laboratory of Philip W. Ingham.

The authors apologise to readers for this mistake.
